# Supplementary material for: The Role of PRLR Gene Polymorphisms in Milk Production in European Wild Rabbit (Oryctolagus cuniculus)
Source: MDPI journal article supplement (doi:10.3390/ani13040671), 2023-02-15
Supplement: s1 [file s1]

| Doe ID | 973AC | 926TC | 496GC | 407GA | Genotype | Msat | Litter size | Milkproduction |         |
|--------|-------|-------|-------|-------|----------|------|-------------|----------------|---------|
| 1      | 1     | 1     | 1     | 1     | 1111     | 3    | 7           | 1686,60        |         |
| 2      | 2     | 2     | 2     | 3     | 3        | 2233 | 2           | 4              | 1093,00 |
| 3      | 1     | 1     | 1     | 1     | 1111     | 3    | 3           | 741,02         |         |
| 4      | 2     | 2     | 3     | 3     | 2233     | 2    | 6           | 1812,54        |         |
| 5      | 1     | 1     | 1     | 1     | 1111     | 3    | 4           | 914,00         |         |
| 6      | 1     | 1     | 1     | 1     | 1111     | 3    | 5           | 1571,88        |         |
| 7      | 1     | 1     | 1     | 1     | 1111     | 3    | 2           | 1034,00        |         |
| 8      | 1     | 1     | 1     | 1     | 1111     | 3    | 5           | 1352,09        |         |
| 9      | 2     | 3     | 3     | 1     | 2331     | 2    | 6           | 2098,97        |         |
| 10     | 2     | 2     | 3     | 3     | 2233     | 2    | 5           | 1530,00        |         |
| 11     | 2     | 2     | 3     | 3     | 2233     | 2    | 8           | 1392,76        |         |
| 12     | 3     | 3     | 3     | 3     | 3333     | 1    | 6           | 1637,60        |         |
| 13     | 3     | 3     | 3     | 3     | 3333     | 2    | 6           | 1387,50        |         |
| 14     | 1     | 1     | 1     | 1     | 1111     | 3    | 4           | 1254,00        |         |
| 15     | 2     | 2     | 3     | 1     | 2231     | 2    | 3           | 1237,00        |         |
| 16     | 1     | 1     | 1     | 1     | 1111     | 3    | 6           | 1828,00        |         |
| 17     | 2     | 2     | 3     | 3     | 2233     | 2    | 3           | 598,00         |         |
| 18     | 1     | 1     | 1     | 1     | 1111     | 3    | 5           | 1366,00        |         |
| 19     | 1     | 1     | 1     | 1     | 1111     | 3    | 8           | 1608,00        |         |
| 20     | 1     | 1     | 1     | 1     | 1111     | 3    | 4           | 1291,00        |         |
| 21     | 1     | 1     | 1     | 1     | 1111     | 3    | 5           | 1333,97        |         |
| 22     | 1     | 1     | 1     | 1     | 1111     | 3    | 6           | 1556,00        |         |
| 23     | 2     | 2     | 3     | 1     | 2231     | 2    | 6           | 1285,00        |         |
| 24     | 2     | 2     | 3     | 1     | 2231     | 2    | 5           | 1325,91        |         |
| 25     | 2     | 2     | 3     | 1     | 2231     | 3    | 4           | 529,00         |         |
| 26     | 2     | 2     | 3     | 1     | 2231     | 2    | 5           | 2192,00        |         |
| 27     | 3     | 3     | 3     | 3     | 3333     | 1    | 6           | 2142,00        |         |
| 28     | 2     | 2     | 3     | 1     | 2231     | 2    | 5           | 1814,00        |         |
| 29     | 1     | 1     | 1     | 1     | 1111     | 3    | 3           | 1486,00        |         |
| 30     | 1     | 1     | 1     | 1     | 1111     | 3    | 3           | 1132,00        |         |
| 31     | 1     | 1     | 1     | 1     | 1111     | 3    | 2           | 1221,00        |         |
| 32     | 1     | 1     | 1     | 1     | 1111     | 3    | 4           | 1716,00        |         |
| 33     | 2     | 2     | 3     | 1     | 2231     | 2    | 2           | 1444,00        |         |
| 34     | 1     | 1     | 1     | 1     | 1111     | 3    | 4           | 1650,00        |         |
| 35     | 3     | 3     | 3     | 3     | 3333     | 1    | 3           | 1092,00        |         |
| 36     | 2     | 2     | 3     | 3     | 2233     | 2    | 6           | 2079,00        |         |
| 37     | 2     | 2     | 3     | 3     | 2233     | 2    | 3           | 1255,00        |         |
| 38     | 1     | 1     | 1     | 1     | 1111     | 3    | 5           | 1542,00        |         |
| 39     | 1     | 1     | 1     | 1     | 1111     | 3    | 5           | 1005,00        |         |
| 40     | 1     | 1     | 1     | 1     | 1111     | 3    | 4           | 2092,00        |         |
