# Supplementary material for: The Role of PRLR Gene Polymorphisms in Milk Production in European Wild Rabbit (Oryctolagus cuniculus)
Source: MDPI journal article supplement (doi:10.3390/ani13040671), 2023-02-15
Supplement: s1 [file s1]

>wild rabbit PRLR gene promoter sequence

ATAGCTCCCTGAGGCTTGGTAAGCAGCAACTACCTGCTCAACGCCAGGTGCCCCA  
GAGCAGCAGTCAAATCAAAGGGGAAGCCCAGGGTTCCTGCAGCTGTTTTTTGAAA  
CTCAATAGCCTTTATTCAAAGTATCTCCCTAGCCACCCTCCAGGTTACATAACAAT  
CAGGTGCAATATTAATTAGTGACATCAAACAGACACTAGCTACCTACTCATTCAA  
GGATAACTCTTTGATTTCAGGCAACTGCTACTACTATTTGTTTCAGTACTTTTGCAA  
GAGAAAAAGTGAGTGGTGGTTGTGTGTGGTTTTGTTAATACTAAAACCAAACCAA  
AAAAAAAAAAAAAGGAAAAAGGAAAAAGCATCAGAACGTCCAGCCCTACTAGA  
AAAGATAAGTAGATAAATCATgTATTTGTGAACAACAACAAAGTGTGGGTATTT  
GGGCACGACTACAATTGATGTGACAGGGAATAAACCTCCACATCCTGGAAGTTTG  
gACTTCCGGTATTAATAAATAGAAAGCAAACCTGTTTGGACCACTGACCCTTGATTT  
TCCTTTGCCCCCTTTCTCTCTGAActcctcctcctcAGGGAAGGTCAGACTGAAATCCCAG  
AGCCCCCAACCCCCCATCACAAATATTGTCAAGCTGCCATTCAGTGTTGCTGGGA  
AATAAGAAATTTGACACCGAGGCTCTCTCCATGGCTTGGCAGCAAAGAGAAATAT  
CATCTTTGAGGTCATTCGACCGATTTCAGACATTATTATTTCTGTTTTGTCTGTGTTT  
TCTGCTACAGTGTCAACGCAAGATGCGTGGCCTTGATCGTGTAGATCTGATCTGG  
GGAGAATCCGTGAATTCTTCACATCTTCGCTGCATTCCGGCTCCTCCGACCGCGTC  
CCTCACCTTGTA AAAACTGGCAGGCTCTGGACATTtTGCTTGCTGAAGAAAATCACT  
GTTTCGCCTCCAGCAAGGAACGTAAaTGTTGCAACCCTGACTCCTCCTCTAATGAA  
GAAAGAGTGGACAAGTGCACCGAGTTGAGCTGCTGCTCGCAGAAGCCACCGGGC  
TGCCACGGAAGCTGAAAGCCCCAGACAGCACTGCTCCTGGGCTGGGCTTCCCGC  
CCTGGCCTTTCTGTCGTA TAGCTCTTCTCCCCCTCCTTTCTGGATTTTACCGGCTG  
TTCGCGAAACAGCTTTCACA CAATGGATCTCCACGTCCCA
